# Supplementary material for: Effects of Switching from Degludec to Glargine U300 in Patients with Type 1 Diabetes Having Large Day-to-Day Glycemic Variability: A Retrospective Study
Source: Research Square preprint supplement (doi:10.21203/rs.3.rs-503447/v2), 2021-07-28
Supplement: Supplementary file 1 [file c884f7423535197312f26cfa.xlsx]

## Sheet: Sheet1
	Gla-300	Deg	p-value
SD-FBG, mg/dL	-15.6 ± 17.3	0.9 ± 7.3	0.04
Frequency of total hypoglycemia, times per month	-1.4 ± 3.6	-0.2 ± 3.6	0.23
Frequency of nocturnal hypoglycemia, times per month	-1.1 ± 1.2	0.4 ± 1.7	0.02
Frequency of severe hypoglycemia, times per month	-0.3 ± 1.0	0.3 ± 1.5	0.17
FPG, mg/dL	8.1 ± 107	18.5 ± 58	0.39
HbA1c, %	0.1 ± 0.5	0.0 ± 0.6	0.43
Dose of ultra-long acting insulin, unit per kg	0.00 ± 0.03	0.00 ± 0.08	0.32
Dose of bolus insulin, unit per kg	0.01 ± 0.03	0.00 ± 0.02	0.38
BMI, kg/m2	-0.22 ± 0.42	0.04 ± 0.51	0.11
